# Supplementary material
Source: PubMed Central journal article supplement (PMC2689016)
Supplement: 0811584106_0811584106SI.pdf [file 0811584106_0811584106SI.pdf]

# Supporting Information

Weaver et al. 10.1073/pnas.0811584106

## SI Methods

**Antigen Presentation Assays.** T cell hybridomas were maintained as previously described (1);  $1.5 \times 10^4$  CD11c<sup>+</sup> purified dendritic cells from BALB/c spleen were cocultured with  $5 \times 10^4$  of the HA[126-138] specific, I-A<sup>d</sup>-restricted T cell hybridoma (TS2) (2). In some groups, 1  $\mu$ M of MalE[69-84], MalE[102-115], and MalE[269-284] were added as competing peptides. IL-2 was quantified by using cytotoxic T lymphocyte line (CTLL) and (3-(4,5-Dimethylthiazol-2-yl)-2,5-diphenyltetrazolium bromide (MTT) assays as previously described (3). Results appear as a mean optical density in the MTT assay from duplicate wells read at 570–650 nm on a  $V_{\max}$  plate reader.

**Carboxyfluorescein succinimidyl ester (CFSE) Staining and Cell Tracking.** Obtain a single cell suspension of splenocytes from either HNT or DO11.10 T cell antigen receptor (TcR) transgenic mice and wash cells with PBS 2 times. Take an aliquot of cells to ascertain the percentage of Vb8.3<sup>+</sup>CD4<sup>+</sup> or KJ (1-26)<sup>+</sup>CD4<sup>+</sup>, respectively, expressing cells by FACS analysis. Taking the total number of cells, resuspend cells at  $3 \times 10^6$  cells/mL in PBS in a Falcon tube and add CFSE at 1:5,000 dilution (0.2  $\mu$ M). Invert 3 or 4 times to mix in the CFSE dye and incubate 5 min at 37 °C in the waterbath. Immediately wash the suspension with media three times, and then PBS 5 times. Cells were then resuspended in PBS at  $5 \times 10^6$  cells/200  $\mu$ L Vb8.3<sup>+</sup>CD4<sup>+</sup> or KJ (1-26)<sup>+</sup>CD4<sup>+</sup>, respectively, T cells for transfer via retro-orbital injection by using a 29G  $\frac{1}{2}$ " tuberculin syringe 24 h after the immunization.

Draining lymph nodes were harvested 48 h after transfer, and cell division was assessed by FACS and analyzed by using MODFIT v.3.0.

**Bone Marrow-Derived Dendritic Cell (BMDC) Preparation.** Bone marrow cells were obtained by first removing the femurs from mice and stripping all of the tissue from the surface of the bone. Using scissors, cut both ends off of the femur. With a 25G  $\frac{1}{2}$ " syringe, insert the tip into one open end of the femur, and expel 5 mL media, removing all of the bone marrow cells, into a Petri dish containing 10 mL media. The cells were vigorously pipeted to form a single cell suspension, filtered through a 45  $\mu$ M sterile filter, washed, and resuspended to  $4 \times 10^5$  cells/mL; 10 mL of the suspension was plated onto Petri dishes in the presence of 20 ng/mL granulocyte-macrophage colony stimulating factor (GMCSF). At day 3, an additional 10 mL of media containing 20 ng/mL GMCSF was added to each plate. At day 6, 10 mL of media was aspirated and spun down to pellet any cells. These cells were resuspended with fresh media and added back to the original plate. On day 7, 10 ng/mL LPS (Sigma-Aldrich) was added to each plate to mature the dendritic cells. The next day, the plates were gently washed and pooled, collecting only the floating cells. Enriched BMDCs were resuspended at  $5 \times 10^5$ /mL in media, and pulsed with peptide at the indicated dose. Verification of enrichment for BMDC was performed by staining with class II-FITC (39-10<sup>-8</sup>) and CD11c-PE (HL3) (BD PharMingen) and analyzed on a BD FACS Caliber.

1. Loss GE, et al. (1993) Major histocompatibility complex class II-restricted presentation of an internally synthesized antigen displays cell-type variability and segregates from the exogenous class II and endogenous class I presentation pathways. *J Exp Med* 178:73–85.

2. Scott B, et al. (1994) A role for non-MHC genetic polymorphism in susceptibility to spontaneous autoimmunity. *Immunity* 1:73–83.

3. Lazarski CL, et al. (2005) The kinetic stability of MHC class II:peptide complexes is a key parameter that dictates immunodominance. *Immunity* 23:29–40.

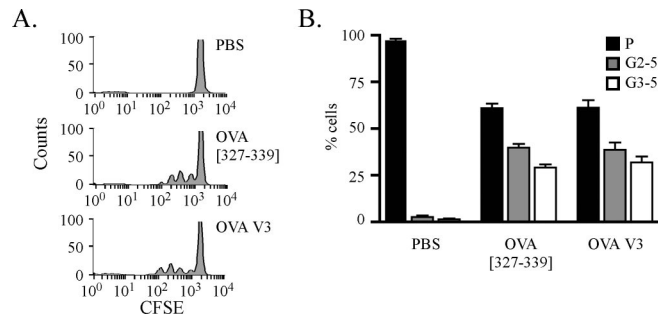

**Fig. S1.** The initial loading and epitope density are similar between low- and high-stability peptides. Mice were immunized in the ear pinnae with BMDC pulsed with  $10 \mu\text{M}$  OVA[327-339] or  $2 \mu\text{M}$  OVA V3; 24 h later, mice were injected i.v. with  $5 \times 10^6$  CFSE-labeled DO11.10 TcR transgenic T cells; 48 h later, the draining lymph nodes were harvested and proliferation determined by FACS. (A) Representative FACS profiles of 2 independent experiments  $n = 2$  per group are shown (counts were manually gated at 100 to adequately observe divisions). (B) The profiles of both experiments were subjected to Modfit 3.0 analyses and the average  $\pm$  SEM of the percentage of cells divided is shown.
